# Supplementary material for: Adaptive mutations promote hepatitis C virus assembly by accelerating core translocation to the endoplasmic reticulum
Source: PubMed Central journal article supplement (PMC7949066; doi:10.1074/jbc.ra120.016010), 2020-11-23
Supplement: mmc1.pdf [file mmc1.pdf]

**Adaptive mutations promote hepatitis C virus assembly by accelerating Core translocation to the endoplasmic reticulum**

Fuxiang Zheng<sup>1,5</sup>, Ni Li<sup>1</sup>, Yi Xu<sup>2</sup>, Yuanping Zhou<sup>3</sup>, Yi-Ping Li<sup>1,4\*</sup>

Supporting information

Figure S1

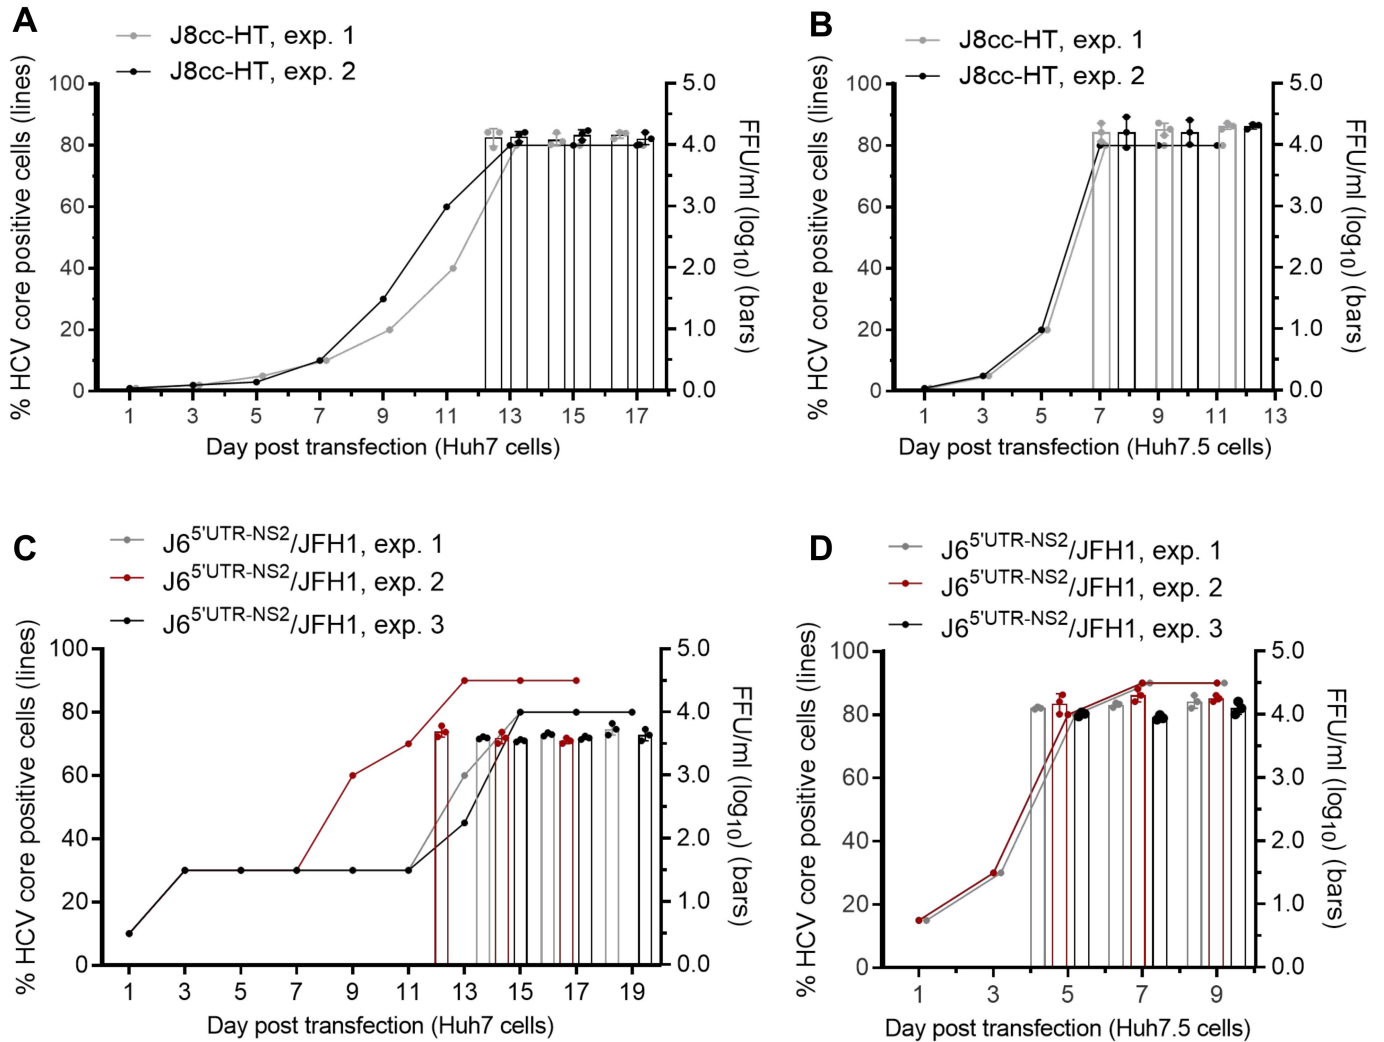

**Fig. S1. Virus spreads of genotype 2b (J8cc-HT) and 2a (J6<sup>5'UTR-NS2</sup>/JFH1) were delayed in Huh7 cells.** Equal amounts (5 µg) of RNA transcripts of 2a J8cc-HT and 2a J6<sup>5'UTR-NS2</sup>/JFH1 recombinants were transfected into Huh7 cells and Huh7.5 cells. (A) In Huh7 cells, the percentages of Core-positive cells (lines) and infectivity titers (bars) of 2b J8cc-HT virus were monitored at days 13, 15, and 17 post transfection. Virus spread was delayed by approximately one week and infectivity titers were 5-fold lower than those in Huh7.5 cells (10<sup>4.5</sup> FFU/ml) (in panel B). (C) In 2a J6<sup>5'UTR-NS2</sup>/JFH1-transfected Huh7 cells, delayed spread was also observed; however at peak infection the infectivity titers were comparable to that in Huh7.5 cells (10<sup>4</sup> FFU/ml) (in panel D). Data are from three independent experiments and are shown as scatter ± SD.

**Figure S2**

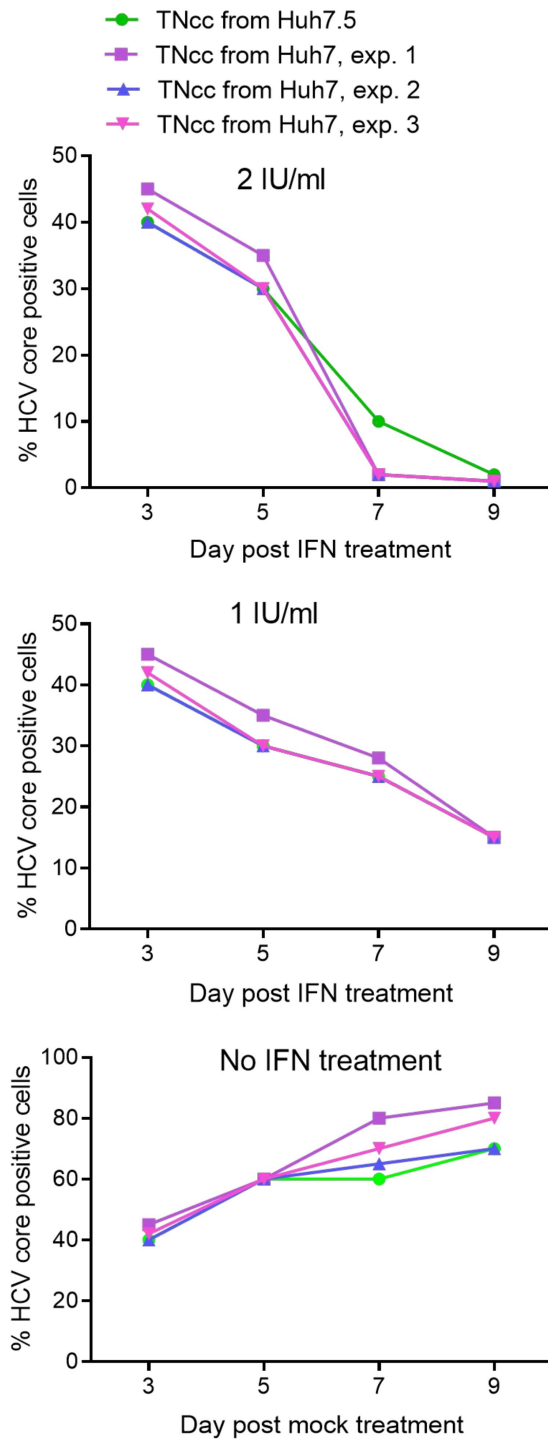

**Fig. S2. Huh7-adapted TNcc viruses did not confer resistance to IFN treatment.** TNcc virus adapted to Huh7 cells collected from three experiments of long-term culture adaption (Fig. 1A) were tested for viral sensitivity to interferon treatment, in comparison with TNcc propagated from

Huh7.5 cells. Huh7.5 cells were infected with TNcc viruses (MOI=0.5), and interferon- $\alpha$  was added into the medium at the indicated concentrations (2 IU/ml, 1 IU/ml, and no IFN treatment). The percentage of HCV Core-positive cells were determined. Data are from three independent experiments and are shown as the means.

Figure S3

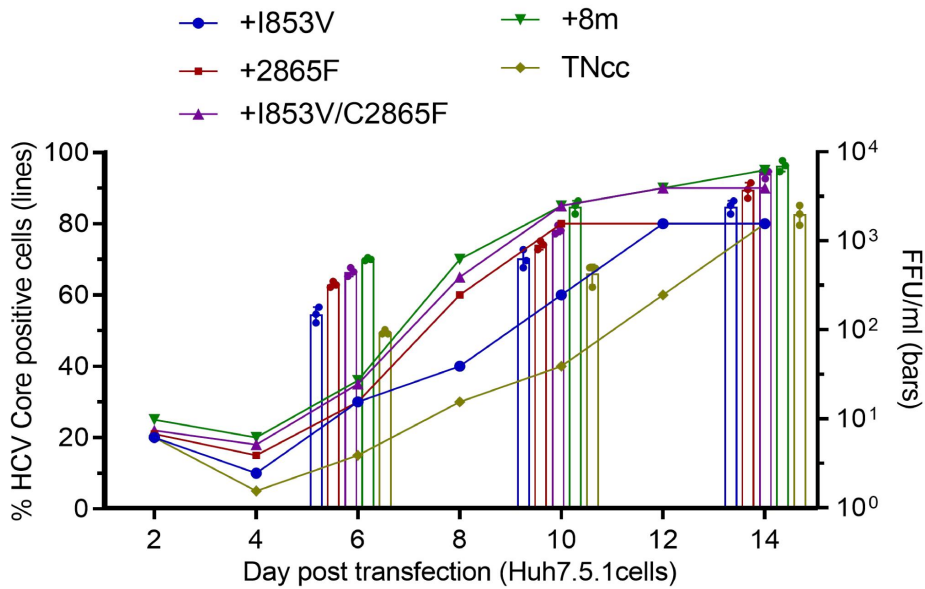

**Fig. S3. TNcc and mutant virus spread efficiently in Huh7.5.1 cells.** Equal amounts (5  $\mu$ g) of RNA transcripts of TNcc with I853V, C2865F, and I853V/C2865F were transfected into Huh7.5.1 cells, in comparison with TNcc and TNcc with eight mutations (8m, Table 1). The percentage of Core-positive cells and the infectivity titers of supernatant were determined at the indicated time points. Data are from three independent experiments and are shown as scatter  $\pm$  SD.
